# Supplementary material for: The Epidemiology of Depression and Diabetes Distress in Type 2 Diabetes in Kuwait
Source: Hindawi journal article supplement (doi:10.1155/2020/7414050), 2020-06-02
Supplement: f1 [file 7414050.f1.pdf]

**Supplementary Table 1:** Distribution of explanatory variables stratified by PHQ-9 depression.

| Explanatory variable             |                  | Total cohort<br>(n=893)<br>Mean (SD)/<br>Proportion<br>(%) | PHQ-9 case positive*<br>(n=273)<br>Mean (SD)/<br>Proportion (%) | PHQ-9 case negative**<br>(n=620)<br>Mean (SD)/<br>Proportion (%) | Mean difference, odds ratio [95% confidence interval] (p-value)† |
|----------------------------------|------------------|------------------------------------------------------------|-----------------------------------------------------------------|------------------------------------------------------------------|------------------------------------------------------------------|
| PHQ-9 score                      |                  | 7.3 (5.4)                                                  | 14.0 (3.7)                                                      | 4.4 (2.7)                                                        | 9.62 [9.2, 10.1] (<0.001)                                        |
| Age (years)                      |                  | 55.3 (10.7)                                                | 54.3 (10.9)                                                     | 55.6 (10.7)                                                      | -1.36 [-3.0, 0.1] (0.067)                                        |
| Duration T2DM (years)            |                  | 12.4 (8.5)                                                 | 12.9 (8.4)                                                      | 12.2 (8.5)                                                       | 0.71 [-0.5, 1.9] (0.260)                                         |
| Sex                              | Male             | 471 (52.7)                                                 | 113 (41.4)                                                      | 358 (57.7)                                                       | 1                                                                |
|                                  | Female           | 422 (47.3)                                                 | 160 (58.6)                                                      | 262 (42.3)                                                       | 1.94 [1.5, 2.58] (<0.001)                                        |
| Nationality                      | Kuwaiti          | 635 (71.1)                                                 | 178 (65.2)                                                      | 457 (73.7)                                                       | 1                                                                |
|                                  | Non-Kuwaiti      | 258 (28.9)                                                 | 95 (34.8)                                                       | 163 (26.3)                                                       | 1.49 [1.1, 2.03] (0.010)                                         |
| Marital status                   | Married          | 768 (90.1)                                                 | 229 (88.8)                                                      | 539 (90.7)                                                       | 1                                                                |
|                                  | Separated/Single | 84 (9.9)                                                   | 29 (11.2)                                                       | 55 (9.3)                                                         | 1.24 [0.8, 2.0] (0.374)                                          |
| Employment status                | Employed         | 361 (50.3)                                                 | 105 (48.6)                                                      | 256 (51.0)                                                       | 1                                                                |
|                                  | Unemployed       | 357 (49.7)                                                 | 111 (51.4)                                                      | 246 (49.0)                                                       | 1.10 [0.8, 1.51] (0.558)                                         |
| Past history of depression       | Yes              | 23 (2.6)                                                   | 13 (4.8)                                                        | 10 (1.6)                                                         | 3.06 [1.32, 7.07] (0.009)                                        |
|                                  | No               | 869 (97.4)                                                 | 259 (95.2)                                                      | 610 (98.4)                                                       | 1                                                                |
| HbA1c (mmol/mol)                 |                  | 70.0 (21.1)                                                | 72.2 (20.2)                                                     | 69.1 (21.5)                                                      | 3.05 [0.01, 6.1] (0.048)                                         |
| BMI (Kg/m <sup>2</sup> )         |                  | 33.2 (6.8)                                                 | 34.5 (6.8)                                                      | 32.6 (6.7)                                                       | 1.88 [0.9, 2.9] (<0.001)                                         |
| Serum triglycerides (mmol/L)     |                  | 1.8 (1.3)                                                  | 1.9 (2.0)                                                       | 1.8 (1.4)                                                        | 0.13 [-0.1, 0.2] (0.262)                                         |
| Serum total cholesterol (mmol/L) |                  | 4.6 (1.1)                                                  | 4.7 (1.1)                                                       | 4.6 (1.1)                                                        | 0.09 [-0.1, 0.2] (0.294)                                         |
| Serum HDL (mmol/L)               |                  | 1.1 (0.5)                                                  | 1.1 (0.5)                                                       | 1.1 (0.5)                                                        | 0.02 [-0.1, 0.1] (0.617)                                         |
| Serum LDL (mmol/L)               |                  | 2.7 (1.0)                                                  | 2.8 (1.0)                                                       | 2.7 (1.0)                                                        | 0.06 [-0.1, 0.2] (0.457)                                         |
| Blood pressure                   | Systolic         | 132 (17.6)                                                 | 130.6 (18.5)                                                    | 131.7 (16.8)                                                     | -1.11 [-0.15, 0.19] (0.372)                                      |
|                                  | Diastolic        | 75 (11)                                                    | 75.3 (10.3)                                                     | 74.6 (11.3)                                                      | 0.72 [0.04, 1.0] (0.405)                                         |
| Dyslipidaemia                    | Diagnosis        | 609 (68.4)                                                 | 187 (68.8)                                                      | 422 (68.2)                                                       | 1.02 [0.75, 1.39] (0.865)                                        |
|                                  | None             | 282 (31.6)                                                 | 85 (31.3)                                                       | 197 (31.8)                                                       | 1                                                                |
| Retinopathy                      | Diagnosis        | 257 (28.8)                                                 | 91 (33.3)                                                       | 166 (26.8)                                                       | 1.37 [1.0, 1.86] (0.046)                                         |
|                                  | None             | 636 (71.2)                                                 | 182 (66.7)                                                      | 454 (73.2)                                                       | 1                                                                |
| Nephropathy                      | Diagnosis        | 195 (21.8)                                                 | 66 (24.2)                                                       | 129 (20.8)                                                       | 1.21 [0.86, 1.70] (0.262)                                        |
|                                  | None             | 698 (78.2)                                                 | 207 (75.8)                                                      | 491 (79.2)                                                       | 1                                                                |
| Neuropathy                       | Diagnosis        | 352 (39.8)                                                 | 117 (43.2)                                                      | 235 (38.3)                                                       | 1.22 [0.91, 1.63]                                                |

|                   |                |             |             |             |                                    |
|-------------------|----------------|-------------|-------------|-------------|------------------------------------|
|                   |                |             |             |             | (0.176)                            |
|                   | None           | 532 (60.2)  | 154 (56.8)  | 378 (61.7)  | 1                                  |
| Stroke            | Yes            | 14 (1.6)    | 5 (1.8)     | 9 (1.5)     | 1.27 [0.42, 3.81]<br>(0.674)       |
|                   | No             | 879 (98.4)  | 268 (98.2)  | 611 (98.5)  | 1                                  |
| Hypertension      | Yes            | 569 (63.7)  | 183 (67.0)  | 386 (62.3)  | 1.23 [0.91, 1.66]<br>(0.172)       |
|                   | No             | 324 (36.3)  | 90 (33.0)   | 234 (37.7)  | 1                                  |
| CVD               | Yes            | 98 (11)     | 33 (12.1)   | 65 (10.5)   | 1.17 [0.75, 1.83]<br>(0.480)       |
|                   | No             | 795 (89)    | 240 (87.9)  | 555 (89.5)  | 1                                  |
| <b>Treatments</b> |                |             |             |             |                                    |
| Diet              | Yes            | 67 (7.5)    | 23 (8.4)    | 44 (7.1)    | 1.20 [0.71, 2.04]<br>(0.488)       |
|                   | No             | 826 (92.5)  | 250 (91.6)  | 576 (92.9)  | 1                                  |
| Insulin           | Yes            | 479 (53.8)  | 172 (63)    | 307 (49.7)  | 1.72 [1.29, 2.31]<br>( $<0.001$ )  |
|                   | No             | 412 (46.2)  | 101 (37)    | 311 (50.3)  | 1                                  |
| Oral Agents alone | Yes            | 756 (84.8)  | 228 (83.5)  | 528 (85.4)  | 0.86 [0.58, 1.27]<br>(0.461)       |
|                   | No             | 135 (15.2)  | 45 (16.5)   | 90 (14.6)   | 1                                  |
| <b>Lifestyles</b> |                |             |             |             |                                    |
| Smoking           | Smoker         | 188 (21.7)  | 59 (22.3)   | 129 (21.4)  | 1.06 [0.74, 1.50]<br>(0.744)       |
|                   | Ex/ Non-Smoker | 680 (78.3)  | 205 (77.7)  | 475 (78.6)  | 1                                  |
| Exercise          | Plan           | 272 (30.5)  | 66 (24.2)   | 206 (33.2)  | 1                                  |
|                   | None           | 621 (69.5)  | 207 (75.8)  | 414 (66.8)  | 1.56 [1.12, 2.15]<br>(0.007)       |
| <b>Measures</b>   |                |             |             |             |                                    |
| <b>PAID</b>       | Range: 0-92.5  | 17.7 (20.1) | 28.9 (25.4) | 13.2 (15.1) | 15.87 [12.2, 19.6]<br>( $<0.001$ ) |

**PHQ-9**, Patients Health Questionnaire Nine; **PAID**, Problem Area in Diabetes; **HDL**, High density lipoprotein; **LDL**, low density lipoprotein; **CVD**, Cardiovascular disease, BMI, Body Mass Index.

\*PHQ-9 score  $\geq 10$  was used to define PHQ-9 positive; \*\*PHQ-9 score  $< 10$  was used to define PHQ-9 negative.

†Test statistic represents t-tests for continuous or odd ratio from the regression analysis.

**Supplementary Table 2:** Distribution of sociodemographic or biomedical variables in original and nested cohort study.

| Variables                        |                  | Cohort sample (n= 893)<br>Mean (SD)/<br>Proportionate (%) | Nested sample (n= 465)<br>Mean (SD)/<br>Proportionate (%) | Mean<br>Difference<br>or Chi-test<br>(p-value)* |
|----------------------------------|------------------|-----------------------------------------------------------|-----------------------------------------------------------|-------------------------------------------------|
| PHQ9 score                       |                  | 7.3 (5.4)                                                 | 7.0 (5.3)                                                 | 0.34 (0.272)                                    |
| PHQ9                             | Positive         | 273 (30.6)                                                | 136 (29.2)                                                | 0.25 (0.614)                                    |
|                                  | Negative         | 620 (69.4)                                                | 329 (70.8)                                                |                                                 |
| Age                              | Years            | 55.2 (10.8)                                               | 55.3 (10.1)                                               | 0.11 (0.851)                                    |
| Duration T2DM                    | Years            | 12.4 (8.5)                                                | 12.5 (8.2)                                                | 0.15 (0.754)                                    |
| Gender                           | Male             | 471 (52.7)                                                | 241 (51.8)                                                | 0.10 (0.749)                                    |
|                                  | Female           | 422 (47.3)                                                | 224 (48.2)                                                |                                                 |
| Nationality                      | Kuwaiti          | 635 (71.1)                                                | 341 (73.3)                                                | 0.75 (0.387)                                    |
|                                  | Non-Kuwaiti      | 258 (28.9)                                                | 124 (26.7)                                                |                                                 |
| Marital Status                   | Married          | 768 (90.1)                                                | 411 (91.1)                                                | 0.33 (0.562)                                    |
|                                  | Single/separated | 84 (9.9)                                                  | 40 (8.9)                                                  |                                                 |
| Employment status                | Employed         | 361 (50.3)                                                | 195 (48.4)                                                | 0.18 (0.668)                                    |
|                                  | Unemployed       | 357 (49.7)                                                | 208 (51.6)                                                |                                                 |
| Past history of depression       | Yes              | 23 (2.6)                                                  | 17 (3.7)                                                  | 1.24 (0.265)                                    |
|                                  | No               | 869 (97.4)                                                | 448 (96.3)                                                |                                                 |
| BMI (kg/m <sup>2</sup> )         |                  | 33.2 (6.8)                                                | 33.3 (6.5)                                                | 0.17 (0.670)                                    |
| HbA1c (mmol/mol)                 |                  | 70.0 (21.1)                                               | 69.4 (20.5)                                               | 0.59 (0.622)                                    |
| Serum triglycerides (mmol/L)     |                  | 1.83 (1.6)                                                | 1.75 (1.0)                                                | 0.08 (0.369)                                    |
| serum total cholesterol (mmol/L) |                  | 4.61 (1.1)                                                | 4.60 (1.1)                                                | 0.01 (0.908)                                    |
| Serum HDL (mmol/L)               |                  | 1.13 (0.5)                                                | 1.11 (0.4)                                                | 0.02 (0.514)                                    |
| Serum LDL (mmol/L)               |                  | 2.73 (1.0)                                                | 2.73 (0.9)                                                | 0.001 (0.991)                                   |
| Dyslipidemia                     | Diagnosis        | 609 (68.4)                                                | 339 (72.9)                                                | 3.01 (0.083)                                    |
|                                  | None             | 282 (31.6)                                                | 126 (27.1)                                                |                                                 |
| Retinopathy                      | Diagnosis        | 257 (28.8)                                                | 132 (28.4)                                                | 0.02 (0.879)                                    |
|                                  | None             | 636 (71.2)                                                | 333 (71.6)                                                |                                                 |
| Neuropathy                       | Diagnosis        | 195 (21.8)                                                | 93 (20.0)                                                 | 0.61 (0.432)                                    |
|                                  | None             | 698 (78.2)                                                | 372 (80.0)                                                |                                                 |
| Neuropathy                       | Diagnosis        | 352 (39.8)                                                | 199 (43.3)                                                | 1.48 (0.224)                                    |
|                                  | None             | 532 (60.2)                                                | 261 (56.7)                                                |                                                 |
| Stroke                           | Diagnosis        | 14 (1.6)                                                  | 9 (1.9)                                                   | 0.25 (0.618)                                    |
|                                  | None             | 879 (98.4)                                                | 456 (98.1)                                                |                                                 |
| Hypertension                     | Diagnosis        | 569 (63.7)                                                | 314 (67.5)                                                | 1.95 (0.163)                                    |
|                                  | None             | 324 (36.3)                                                | 151 (32.5)                                                |                                                 |
| CVD                              | Diagnosis        | 98 (11.0)                                                 | 49 (10.5)                                                 | 0.06 (0.806)                                    |
|                                  | None             | 795 (89.0)                                                | 416 (89.5)                                                |                                                 |
| <b>Treatment</b>                 |                  |                                                           |                                                           |                                                 |
| Diet                             | Yes              | 67 (7.5)                                                  | 37 (8.0)                                                  | 0.09 (0.765)                                    |
|                                  | No               | 826 (92.5)                                                | 428 (92.0)                                                |                                                 |
| Oral Agent alone                 | Yes              | 756 (84.8)                                                | 399 (86.2)                                                | 0.43 (0.512)                                    |
|                                  | No               | 135 (15.2)                                                | 64 (13.8)                                                 |                                                 |
| Insulin                          | Yes              | 479 (53.8)                                                | 252 (54.4)                                                | 0.05 (0.815)                                    |
|                                  | No               | 412 (46.2)                                                | 211 (45.6)                                                |                                                 |
| <b>Lifestyle</b>                 |                  |                                                           |                                                           |                                                 |
| Smoker                           | Smokers          | 188 (21.7)                                                | 98 (21.7)                                                 | 0.001(0.993)                                    |
|                                  | Ex/ non-smokers  | 680 (78.3)                                                | 354 (78.3)                                                |                                                 |
| Exercise                         | Plan             | 272 (30.5)                                                | 135 (29.0)                                                | 0.30 (0.586)                                    |
|                                  | None             | 621 (69.5)                                                | 330 (71.0)                                                |                                                 |

\*Test statistic represents t-tests for continuous, chi-test for categorical variables.
